# Supplementary material
Source: PubMed Central journal article supplement (PMC3683806)

900 **Supplemental Figure Legends**

901 **SUPPL. FIG. 1.** Effect of  $\beta$ -arrestin2 expression on bone metabolic pathways under homeostatic  
902 conditions. **A**, The complete set of 1623 calvarial transcripts with significantly different expression  
903 between vehicle treated wild type (wt NS) and  $\beta$ -arrestin2 null ( $\beta$ arr2<sup>-/-</sup> NS) mice was analyzed by  
904 parametric geneset enrichment of classical signaling pathways. Common pathways from two distinct  
905 databases were used: Molecular Signatures Database ([www.broadinstitute.org/gsea](http://www.broadinstitute.org/gsea)) and Ingenuity  
906 Pathway analysis ([www.ingenuity.com/](http://www.ingenuity.com/)). Selected functional signaling pathways corresponding to signal  
907 transduction, growth factor signaling, nuclear receptor signaling and cell cycle control are shown with  
908 their associated hybrid score ( $-\log_{10}(p) \times$  pathway enrichment ratio). All pathways shown were  
909 significantly populated ( $p \leq 0.05$ ) by at least two individual genes. **B**, The wt NS vs  $\beta$ arr2<sup>-/-</sup> NS geneset  
910 was used to query the GOBP database ([www.geneontology.org](http://www.geneontology.org)). GOBP terms falling into the general  
911 categories of intermediary metabolism, DNA/RNA/protein synthesis/modification, cell cycle,  
912 apoptosis/survival, cytoskeletal rearrangement, and vesicle transport are shown. Hybrid GO term  
913 populations scores ( $-\log_{10}(p) \times$  GO term enrichment factor) shown for each GO term group were  
914 calculated using WebGestalt (<http://bioinfo.vanderbilt.edu/webgestalt/>) from groups populated with at  
915 least 2 individual genes and  $p \leq 0.05$ .

916 **SUPPL. FIG. 2.** Effect of bPTH(7-34) and hPTH(1-34) treatment on biological processes in wild type  
917 and  $\beta$ -arrestin2 null mice. **A**, The wt bPTH(7-34) vs wt NS geneset was used to query the GO term  
918 biological process database. GOBP terms falling into the categories of intermediary metabolism, ion  
919 transport, cell cycle, apoptosis/survival, and cell adhesion/migration are shown. Hybrid scores for each  
920 significantly populated GO term groups were calculated by the product of  $-\log_{10}(p) \times$  GO term  
921 enrichment factor (*WebGestalt*: <http://bioinfo.vanderbilt.edu/webgestalt/>). **B**, Identical analysis performed  
922 using the wt hPTH(1-34) vs wt NS geneset. GOBP terms falling into the general categories of  
923 intermediary metabolism, ion transport, DNA/RNA/protein synthesis and modification, cell  
924 adhesion/migration, bone matrix biosynthesis, and skeletal development/ differentiation are shown.

925 Hybrid score reflects the probability that the observed differences in gene expression in a given gene  
926 cluster did not occur by chance. All GObp shown exceed a minimal threshold significance of  $p \leq 0.05$ .  
927

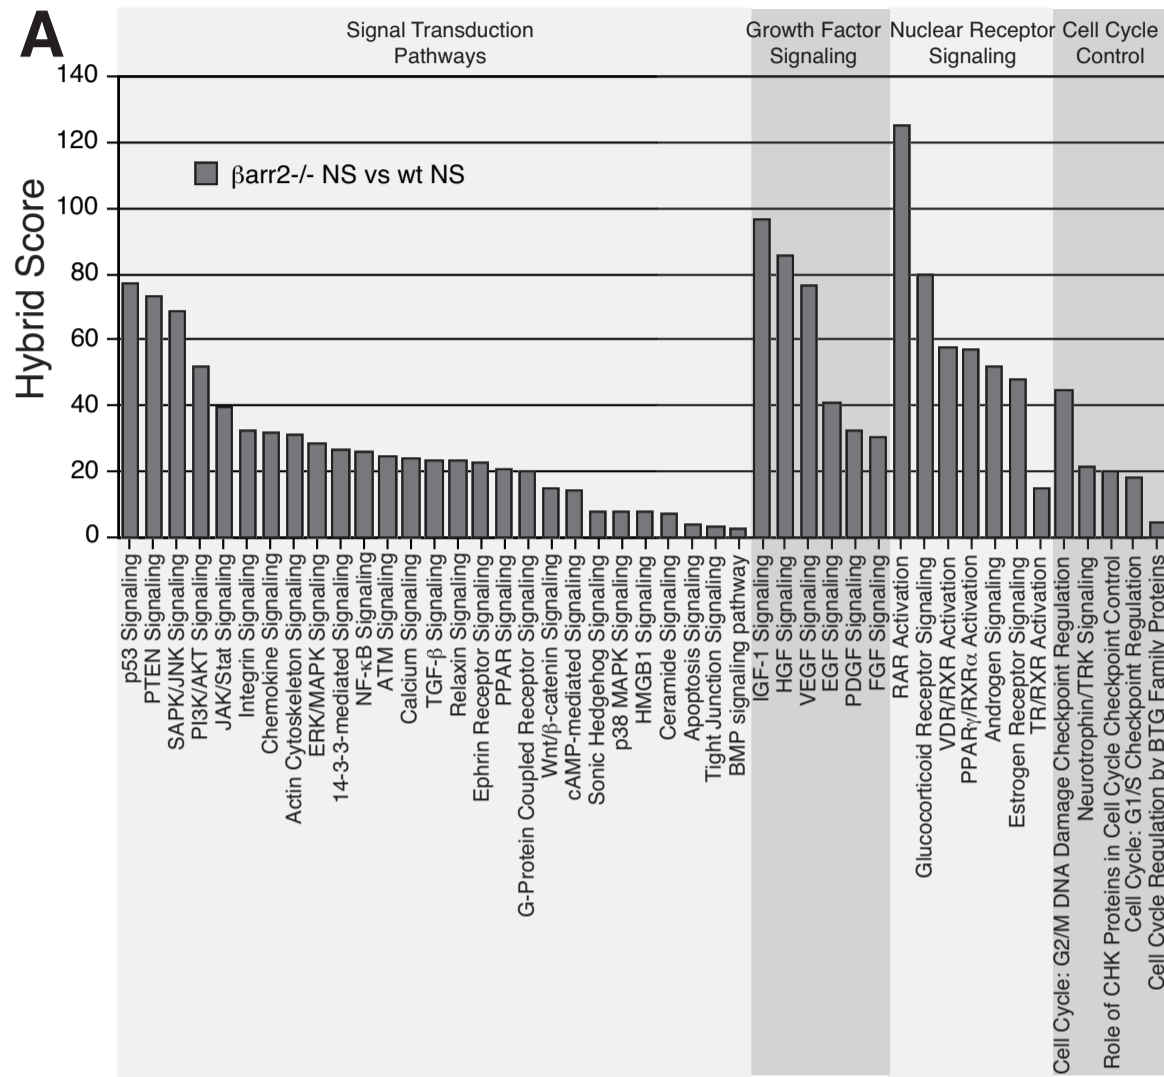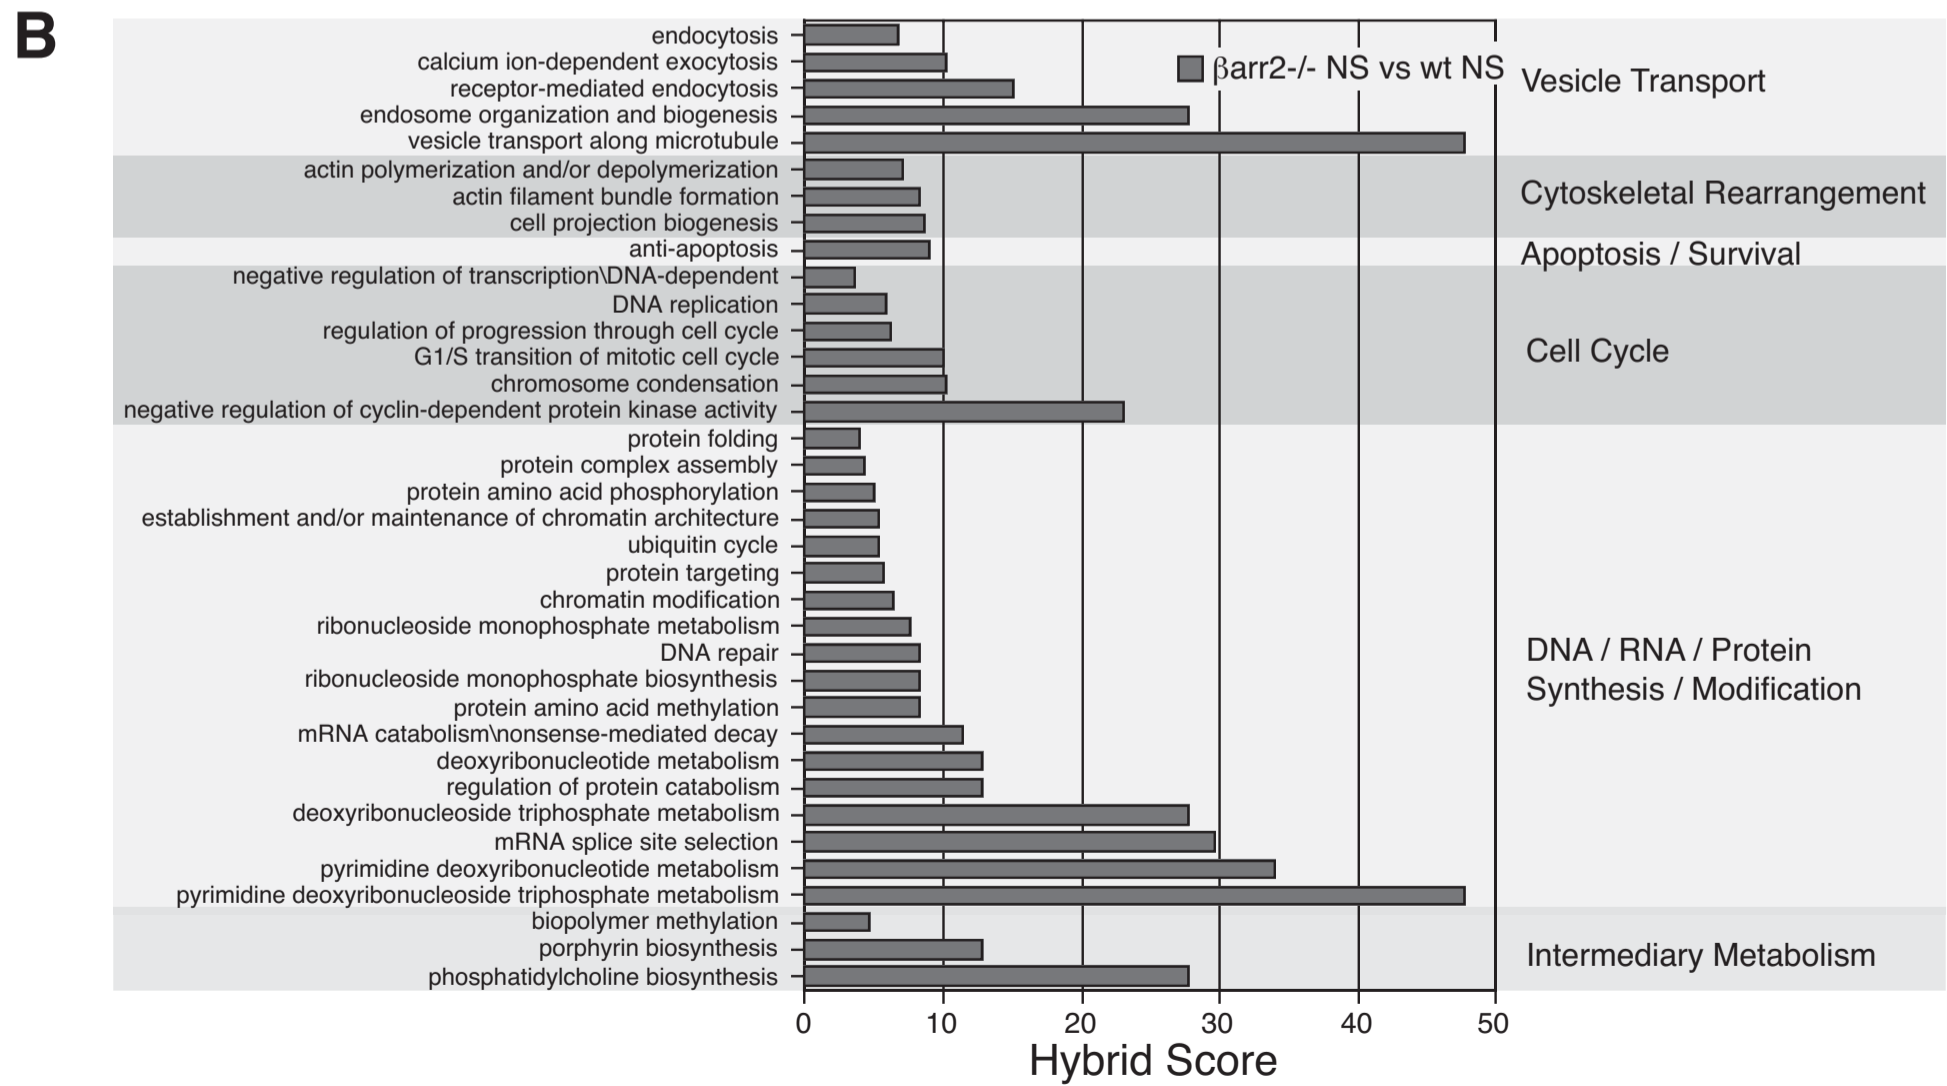

**A**

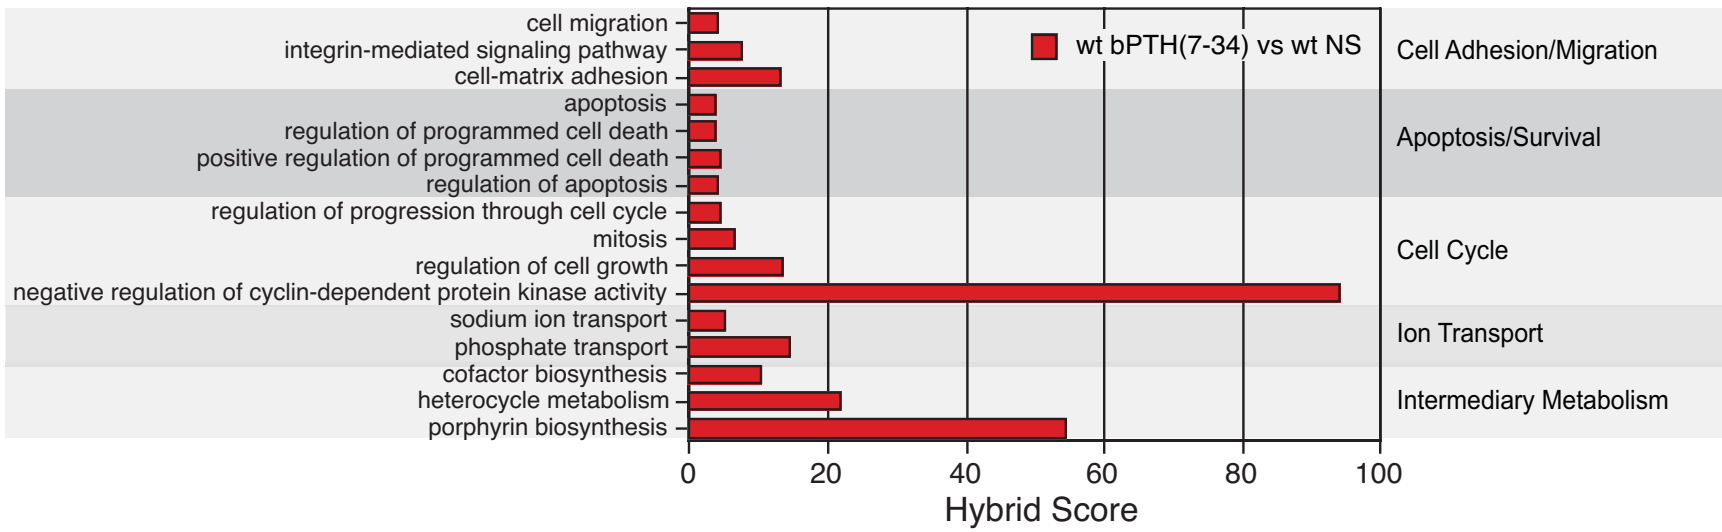

**B**

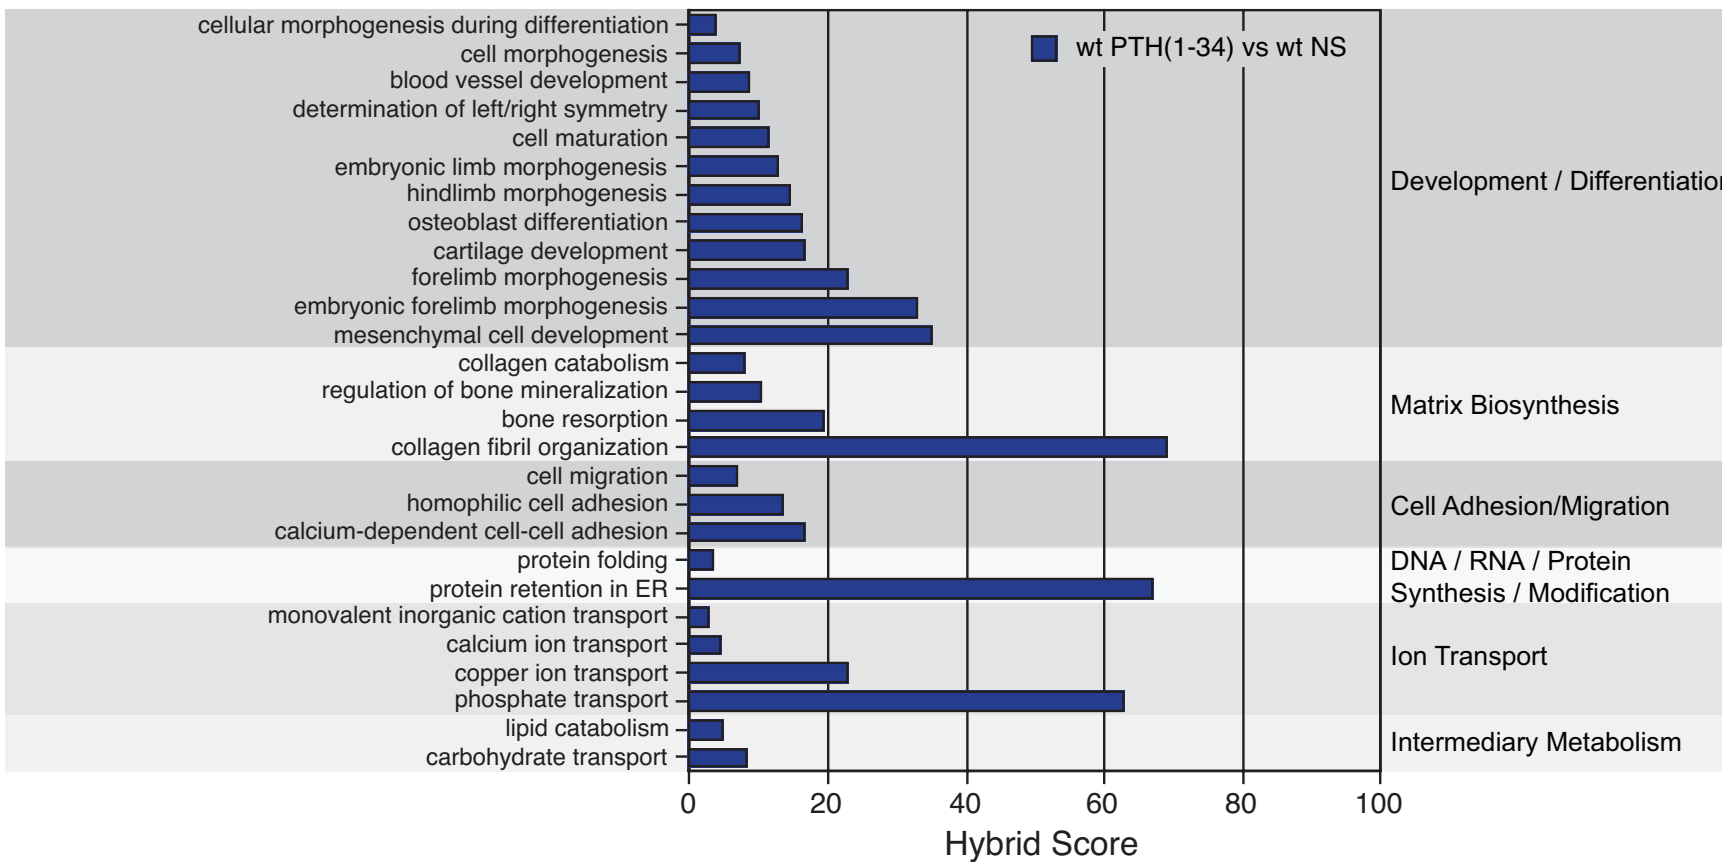

Supplement: supp_me.2012-1091_MEND-12-1091Fig_1-2_SUPPL_FIG_1.pdf [file supp_me.2012-1091_MEND-12-1091Fig_1-2_SUPPL_FIG_1.pdf]
